# Associated factors of acculturation strategies and mental health outcomes among international students in China

Chenchang Xiao<sup>1¶</sup>, Jingyan Yan<sup>2¶</sup>, Hanjia Li<sup>2</sup>, Changmian Ding<sup>2,3\*</sup>, Bin Yu<sup>2\*</sup>

<sup>1</sup>School of Medicine, Wuhan City College, Wuhan, China

<sup>2</sup>Department of Epidemiology and Health Statistics, School of Public Health, Wuhan University, Wuhan, China

<sup>3</sup>Department of Medical Record, Dehong People's Hospital of Yunnan Province, Dehong, China

¶These two authors contributed equally to this work.

\*Correspondence author:

Bin Yu, MD, PhD

Email: [binyu1029@whu.edu.cn](mailto:binyu1029@whu.edu.cn)

## 1 **Abstract**

2 **Objectives:** There is an increasing number of international students in China. Acculturation  
3 strategies are the way students cope with different cultures, including integration, assimilation,  
4 separation, and marginalization. This study aims to investigate the acculturation strategies and  
5 associated factors, and the effect of these strategies on mental health status among international  
6 students in China.

7 **Study design:** Cross-sectional study.

8 **Methods:** Study data were collected from 567 international students attending universities in  
9 China. Acculturation strategies, acculturative stress, depressive symptoms were measured using  
10 reliable and valid scales. Linear and multinomial logistic regression were used for analysis.

11 **Results:** Study findings revealed that integration (31.57%) was the most preferred acculturation  
12 strategy, followed by marginalization (28.92%), separation (21.87%) and assimilation (17.54%).  
13 Females were more likely to choose separation strategy than marginalization, while students with  
14 religions had higher likelihood to choose integration strategy. Students majoring in Literature/Art  
15 and liking their major were more likely to use assimilation strategy. Students with more studying  
16 time in weekdays and medium studying time in weekends were more likely to prefer integration  
17 strategy. Students with separation and integration strategy had higher acculturative stress.

18 **Conclusions:** Integration is the most popular acculturation strategy among international students  
19 in China. Students with separation and integration strategy had worse mental health status.  
20 Gender, major, religion, daily study time were significantly associated with the preference of  
21 acculturation strategies.

22 **Key words:** International students; Acculturation strategies; Acculturative stress; Mental health;

23

## 24 **Introduction**

### 25 **International students in China**

26 With the development of economic globalization, China has attracted a large and increasing  
27 number of international students to study and work. By the end of 2017, there was a total of  
28 489,200 international students from 204 countries studying in China<sup>32</sup>. Studying abroad provides  
29 international students with opportunities to access quality education and expand intercultural  
30 competence<sup>3</sup>. However, adapting to a new cultural, social and educational environment is  
31 challenging and stressful. International students may encounter a lot of challenges, including  
32 language barriers, loneliness, homesickness, and academic failures<sup>4-6</sup>. These difficulties may  
33 increase the risk of developing mental health problems, such as acculturative stress and  
34 depressive symptoms.

### 35 **Acculturation and acculturation strategies**

36 Acculturation is a challenging process of change in values, beliefs, attitudes, and behaviors  
37 when individuals interact with different cultures<sup>7, 8</sup>. Acculturation strategies are the different  
38 coping styles taken by individuals when they live with or contact with two cultures<sup>9</sup>.  
39 Acculturation strategies are developed based on Berry's bi-dimensional acculturation: one is the  
40 identification with the heritage culture, and another is the identification with the host culture.  
41 Thus, four acculturation strategies are generated, including integration, assimilation, separation,

42 and marginalization (Fig 1)<sup>7</sup>. Integration refers to the strategy that individuals maintain the  
43 heritage culture and adopt the host culture simultaneously, while the marginalization strategy  
44 comes true for adopting neither of heritage nor host cultures. Assimilation is the strategy that  
45 people adopt the host culture but reject the heritage culture, while separation is maintaining the  
46 heritage culture but rejecting the host culture. Different acculturation strategies may affect the  
47 process of acculturation for international students<sup>7, 10, 11</sup>.

48 <Insert Figure 1 here>

## 49 **Effect of acculturation strategies on mental health status**

50 Acculturation strategies have been found to be significantly associated with mental health  
51 outcomes, especially acculturative stress and depression<sup>20-22</sup>. For example, one study conducted  
52 among 200 North Indian migrated students in Bangalore city of Karnataka found that students  
53 with separation and marginalization strategies had higher acculturative stress<sup>23</sup>. Another study  
54 among Turkish immigrants in Germany showed that people with integration strategy had the  
55 lowest level of depression, while people with marginalization had the highest<sup>24</sup>. International  
56 students, as a special mobile population, experienced high levels of acculturative stress and  
57 depression<sup>27-30</sup>. However, to our knowledge, few studies have explored the relationships between  
58 acculturation strategies with mental health problems among international students in China.  
59 Therefore, one aim of this study is to investigate the effects of different acculturation strategies  
60 on mental health status.

## 61 **Associated factors of acculturation strategies**

62 An overwhelming empirical studies in acculturation have focused on the effects of different  
63 acculturation strategies on various outcomes<sup>13, 14</sup>. However, limited studies have investigated the  
64 associated factors of acculturation strategies<sup>14, 15</sup>. One study conducted among 210 Turkish  
65 migrants showed that individuals who were young, female and with higher education often  
66 applied a participatory strategy (e.g. integration and assimilation), while those aged 50 or older  
67 and less educated often applied non-participating strategy (e.g. separation and  
68 marginalization)<sup>16</sup>. Another study conducted among 313 immigrant adolescents in Portugal  
69 showed that ethnicity, majority identity, discrimination, experience adaptation, gender, age were  
70 associated with acculturation strategy preference<sup>12</sup>. Other studies also reported that international  
71 students who were married and lived with their spouses may experience sociocultural  
72 segregation because a substantial part of their time was invested in being with their spouses<sup>17, 18</sup>.  
73 Another study conducted among international students in China found that male and longer  
74 residence significantly predicted lower degree of acculturation<sup>19</sup>. However, few studies have  
75 investigated the effect of study-related factors (e.g., major, study time, etc.) on the preference of  
76 acculturation strategies. The main purpose of the study is to investigate the demographic and  
77 study-related factors of acculturation strategies among international students in China.

## 78 **Purpose of the study**

79 The present study aims to (1) investigate the preference of acculturation strategies among  
80 international students in China; (2) examine the associated factors of acculturation strategies; (3)  
81 analyze the associations between acculturation strategies with acculturative stress and  
82 depression. The ultimate goal is to provide data for future effective interventions on mental  
83 health among international students in China.

84

## 85 **Methods**

### 86 **Participants and sampling**

87 Participants in the study were international students who were attending universities in  
88 Wuhan, China with foreign nationality. Wuhan is a university city with 82 colleges and  
89 universities with over 19,000 international students were studying in Wuhan in 2016<sup>33</sup>. Four  
90 largest universities in Wuhan, covering nearly 60% of the total international students, were  
91 selected to recruit participants<sup>34</sup>.

92 Detailed sampling processes were described elsewhere<sup>5, 34</sup>. Briefly, firstly, four universities  
93 were selected from Wuhan, including Wuhan University, Huazhong University of Science and  
94 Technology, Central China Normal University, and Zhongnan University of Economics and  
95 Law. Secondly, in each selected university, classes of international students, the smallest unit for  
96 schooling in China, were randomly selected. All international students in China were grouped  
97 into classes to study Chinese mandarin with approximately 40-50 students per class. All  
98 international students in the selected classes were eligible to participate. The study was  
99 voluntary, and only the students who signed the written informed consent were recruited. A total  
100 of 630 international students were recruited and completed the survey.

### 101 **Data collection**

102 Data were collected through the self-developed International Student Health and Behavior  
103 Survey (ISHBS). The ISHBS is a packet of questionnaires that asked about demographic and

104 study-related information, acculturative stress, acculturation strategies, and depression. Both  
105 English and Chinese versions of the questionnaire were available for participants to choose from.  
106 No significant difference was found between the data collected using Chinese version (n=62) and  
107 English version (n=505)<sup>5</sup>.

108 The survey was conducted in September 1st in 2012 and ended in November 30th. The  
109 survey was implemented in a classroom with a vacant seat placed between two students to ensure  
110 personal privacy and independence. At the end of survey, all participants were asked to put their  
111 questionnaire into an envelope and placed it into a pre-prepared locked box. Data were manually  
112 entered into the computer with Epidata software. Double-entry protocol was used for minimizing  
113 data-entry errors. Among 630 international students, 63 were excluded due to the missing data  
114 for several key variables, yielding 567 (90%) participants in the final sample. The study was  
115 approved by the institutional review board at Wuhan University, China.

## 116 **Measures**

### 117 **Acculturation Strategy**

118 Acculturation strategy was measured using the self-developed Acculturation Strategy  
119 Assessment (ASA) (supplementary Table S1). ASA was developed based on Berry's four  
120 strategies of acculturation<sup>7, 35</sup>, and several developed scales measuring acculturation strategies<sup>7,  
121 36-38</sup>. ASA consists of 30 items assessing two dimensions of acculturation with 15 items for each  
122 dimension. One dimension measures the host culture adaptation, another dimension measures the  
123 self-culture maintenance. A seven-point Likert scale was used to measure the ASA ranging from  
124 1 (strongly disagree) to 7 (strongly agree). Total score for each dimension was computed.  
125 Median score for each dimension was used as cut-off point. Participants scored high on both

126 dimensions were categorized as “Integration”, and participants who scored low on both were  
127 categorized as “Marginalization”. Participants were grouped into “Assimilation” if they scored  
128 high on host culture subscale, and low on self-culture subscale, and participants were grouped  
129 into “Separation” if scored opposite. The Cronbach alpha was 0.87 for total ASA, and 0.86 for  
130 host culture subscale and 0.85 for self-culture subscale.

### 131 **Acculturative Stress**

132 Acculturative stress was measured using the Acculturative Stress Scale for International  
133 Students (ASSIS)<sup>39</sup>. ASSIS is a widely used scale with 36 items, measured using a five-point  
134 Likert scale ranging from 1 (strongly disagree) to 5 (strongly agree). In our previous study<sup>5</sup>, we  
135 categorized the ASSIS into seven subscales, including value conflict (VC), identity threat (IT),  
136 opportunity deprivation (OD), mistreated (MT), lack of cultural competence (CC), lack of self-  
137 confidence(CS), and homesickness (HS) based on the item content, item response, exploratory  
138 and confirmative factor analysis. Total score was estimated with higher score indicating greater  
139 level of acculturative stress. The Cronbach alpha was 0.93.

### 140 **Depression**

141 Depression was measured using the 10-item Centers for Epidemiological Studies  
142 Depression Scale (CESD-10)<sup>40</sup>. A four-point Likert scale was used to assess individual items  
143 with 0 (rarely or none of the time, or less than 1 day) to 3 (most of the time or 5–7 days). Two  
144 items were reversely coded, and total scores were computed with higher scores indicating greater  
145 depression. The Cronbach alpha was 0.70.

146 *Demographic variables and covariates*



147 Demographic variables and other covariates in the study included age (in years), gender  
148 (male/female), place of origin (Asia/Africa/others), marital status (unmarried/married/divorced  
149 /separated/others; and was categorized into unmarried/others), education (undergraduate  
150 /graduate), religion (Christian/Muslim/Hinduism or Buddhism/Judaism/ no religion/others),  
151 duration in China (in months; and was categorized into one year or less/more than one year),  
152 major area (sciences/language and art/medicine/business/law/others), if like the major (don't  
153 like/don't know/like), level of preparedness before coming to China (not well/well), number of  
154 roommates (0/1/2/3 or more), study time in weekdays/weekends (0-2 hours/3-4 hours/5-6  
155 hours/> 6 hours).

## 156 **Statistical analysis**

157 Descriptive analyses (e.g., frequency, mean, standard deviation) were used to describe the  
158 sample characteristics. Chi-square analysis was used to compare the frequency of four  
159 acculturation strategies across different covariates. Multinomial logistic regression was used to  
160 investigate the associated factors of four acculturation strategies with marginalization as  
161 reference group. The covariates with p value less than 0.1 in the Chi-square test were included in  
162 the multinomial logistic regression analysis. Linear regression was used to investigate the  
163 associations between acculturation strategies with acculturative stress and depression when  
164 controlling for covariates. All statistical analyses were conducted using SAS version 9.4 (SAS  
165 Institute, Cary, NC, USA).

166

## 167 **Results**



189 =2.61, 95% CI = [1.01, 6.79]), Muslim ( $OR = 4.55$ , 95% CI = [1.65, 12.53]), and  
190 Buddhist/Hindu ( $OR = 3.57$ , 95% CI = [1.20, 10.65]) had higher likelihood to choose integration  
191 strategy. Students majoring in Literature/Art ( $OR = 3.00$ , 95% CI = [1.05, 8.59]) were more likely  
192 to use assimilation strategy, while students who like their own major preferred to utilize  
193 assimilation strategy. Integration strategy was often applied by the students whose daily studying  
194 time were 3-4 hours ( $OR = 2.83$ , 95% CI = [1.28, 6.30]), 5-6 hours ( $OR = 3.65$ , 95% CI = [1.47,  
195 9.08]), >6 hours ( $OR = 3.99$ , 95% CI = [1.70, 9.39]) in weekday and 3-4 hours ( $OR = 1.94$ , 95%  
196 CI = [1.00, 3.79]) in weekend.

197 <Insert Table 3 here>

## 198 **Effects of acculturation strategies on acculturative stress and** 199 **depression**

200 Results in Table 4 show that compared with international students with marginalization  
201 strategy, those with separation ( $\beta = 11.08$ ,  $p < 0.001$ ) and integration ( $\beta = 6.66$ ,  $p < 0.05$ ) had higher  
202 acculturative stress. Individuals with separation strategy were more likely to have higher stress in  
203 homesickness ( $\beta = 3.14$ ,  $p < 0.001$ ), value conflicts ( $\beta = 1.77$ ,  $p < 0.001$ ), mistreat ( $\beta = 1.18$ ,  $p < 0.05$ ),  
204 lack of cultural competence ( $\beta = 1.75$ ,  $p < 0.001$ ) and lack of self-confidence ( $\beta = 1.34$ ,  $p < 0.05$ ),  
205 while students with assimilation had higher value conflicts than marginalization ( $\beta = 1.08$ ,  
206  $p < 0.05$ ), and students with integration had higher homesickness ( $\beta = 1.69$ ,  $p < 0.001$ ), value  
207 conflicts ( $\beta = 1.40$ ,  $p < 0.001$ ) and lack of cultural competence ( $\beta = 1.04$ ,  $p < 0.05$ ).

208 <Insert Table 4 here>

## 209 **Discussion**

210 This study applied Berry's acculturation framework<sup>7,9</sup> to examine acculturation strategies of  
211 international students in China. Four acculturation strategies, including marginalization,  
212 separation, assimilation and integration, were measured. The study investigated the associated  
213 factors of the four strategies and the associations between the four strategies and mental health  
214 status among international students. Findings of the study provided information to understand the  
215 acculturation strategies, and provide evidence in developing future effective interventions on  
216 mental health among international students.

### 217 **Acculturation strategies among international students in China**

218 Our findings reveal that integration was the most popular strategy among international  
219 students, consistent with previous studies in different countries, including China<sup>42</sup>, Japan<sup>43</sup>,  
220 Belgium<sup>15</sup> and the United States<sup>13</sup>. Multicultural society has been gradually forming and played  
221 an important role in choice of integration strategy<sup>15,44,45</sup>. Assimilation was the least preferred  
222 strategy and less than one third of participants abandoned their heritage culture and actively  
223 participated in Chinese culture. One possible explanation was that the development of cultural  
224 values is subtle, and it would be difficult to modify or abandon specific cultures<sup>46</sup>. Another  
225 possible reason was that most international students prefer to return to their home countries after  
226 completing their short-term studies in China. Thus, they are less likely to change their values<sup>15</sup>.  
227 Marginalization and separation were found to be the moderate preferred strategies in our study,  
228 which were in line with the previous studies<sup>43,47</sup>.

### 229 **Acculturation strategies and associated factors**

230 The study investigated the associated factors of the four acculturation strategies, and  
231 identified six significant factors, including gender, religion, major, preference of major, daily  
232 studying time in weekday and weekend. Relative to males, females were more likely to choose  
233 separation strategy. Females tend to build stronger co-national ties, whose primary social  
234 network was the friendships with people from the same home country<sup>15</sup>. More domestic  
235 cultural contacts than international exchanges may lead to higher likelihood of adopting  
236 separation strategy.

237 International students majoring in Literature/Art, liking their own major were more likely to  
238 prefer the strategy of assimilation. Students majoring in Literature/Art had higher aesthetic taste,  
239 imaginative thinking, and historical logic, and were more knowledgeable in history, culture,  
240 politics, society, etc. The skills and knowledge might play important roles in cross-cultural  
241 contacts<sup>48</sup>. In addition, compared with students majoring in Science, Liberal Arts students had  
242 higher intercultural competence, including more intercultural communication, more confidence  
243 in dealing with situational diversities, and more likelihood to show active attitude toward various  
244 cultures<sup>49</sup>. Students majoring in Literature/Art were also often characterized with higher cultural  
245 awareness. They studied Chinese language and cultural arts so as to comprehensively understand  
246 Chinese culture. Therefore, they will actively participate in the culture of China and enjoy the  
247 fun during their limited study time.

248 Students with religions of Christian, Muslim, and Buddhist/Hindu were more likely to  
249 prefer integration strategy than marginalization. China is a multi-religious country with five  
250 major religions, including Buddhism, Taoism, Islam, Catholicism and Christianity<sup>50</sup>. There are  
251 more than 100 million people with religions, more than 85,000 places for religious activities,  
252 and over 3,000 religious groups in China<sup>50</sup>. Laws in China give people the freedom and respect

253 of religious beliefs. International students with various religions could maintain their religion  
254 while simultaneously enjoy the Chinese culture.

255 Findings of the study also show that students with more time on study in weekdays were  
256 more likely to be integrated in both cultures. The students spending more time on study in  
257 weekday may actively participate in the curriculum practice and maintain interactions with  
258 teachers and classmates to improve their academic achievements. Meanwhile, these students may  
259 gather more social support through the social networks developed in the process of learning and  
260 interpersonal communication with Chinese students and local people<sup>51</sup>. Furthermore, it was also  
261 beneficial in improving Chinese language and deepening the understanding of Chinese culture<sup>52</sup>.

## 262 **Effects of acculturation strategies on mental health status**

263 Findings of the study indicate that relative to marginalization strategy, international students  
264 with separation strategy had higher level of acculturative stress, particularly higher in  
265 homesickness, value conflict, mistreated, lack of cultural competence and lack of self-  
266 confidence. It was consistent with previous studies that individuals who separate themselves  
267 from the host culture were more likely to experience a higher level of cultural stress<sup>35</sup>.  
268 Individuals who applied separation strategy tend to perceive greater cultural distance<sup>53</sup>, which in  
269 turn may lead to higher acculturative stress and more homesickness<sup>54, 55</sup>. On the other hand,  
270 findings of the study show that students with integration strategy also had higher level of  
271 acculturative stress and its components, including homesickness, value conflicts and lack of  
272 cultural competence. The results were contrary to previous studies among immigrants that people  
273 with integration strategy had the lowest acculturative stress<sup>4, 7</sup>. The underlying mechanism of the  
274 different results would be complicated. One possible reason was that international students,

275 unlike immigrants, arrived in the host country for a short period of time. Previous studies have  
276 reported that individuals often experience higher acculturative stress in the first two years of  
277 immigration<sup>56, 57</sup>. In this study, 72.31% of international students have lived in China for only one  
278 year or less. During the process of integration, poor language communication and insufficient  
279 cultural integration may trigger different aspects of cultural conflicts, especially value conflicts.  
280 International students often feel homesickness after leaving home<sup>58</sup>, however, homelessness may  
281 also become stressful when the lack of cultural competence and value conflict happened<sup>5, 39</sup>.

## 282 **Limitations**

283 There were limitations in the study. Firstly, it was a cross-sectional study. Longitudinal  
284 studies are needed in the future to examine the causal relationships of international students'  
285 acculturation strategies with mental health. Secondly, the study was conducted with international  
286 students in Wuhan City. Cautions are needed when generalizing the results to the international  
287 students of the whole nation. Thirdly, data of this study were self-reported. Recall bias and social  
288 undesirability could not be ruled out.

## 289 **Conclusions**

290 Integration is the most popular acculturation strategy among international students in  
291 China. Students with separation and integration strategy had worse mental health status. Gender,  
292 major, religion, daily study time were significantly associated with the preference of  
293 acculturation strategies. Finding in the study deepened our understanding of acculturation  
294 strategy among international students in China, and provided evidence for developing future  
295 effective interventions to prevent the mental health in this special population.

## 296 **Acknowledgments**

297           The study conception and design were thought by Chenchang Xiao and Bin Yu. Data  
298 collection was conducted by Chenchang Xiao, Jingyan Yan, Hanjia Li, Changmian Ding and Bin  
299 Yu. Data analysis was conducted by Chenchang Xiao and Jingyan Yan. Drafting of manuscript  
300 was conducted by Chenchang Xiao, Jingyan Yan, Hanjia Li and Changmian Ding. Review of the  
301 manuscript was conducted by Bin Yu.

## 302 **Reference**

- 303 1. Yusoff YM. Self-Efficacy, Perceived Social Support, and Psychological Adjustment in  
304 International Undergraduate Students in a Public Higher Education Institution in Malaysia.  
305 Journal of Studies in International Education. 2012; 16:353-71.
- 306 2. Oecd. Education at a glance 2017: OECD Publishing; 2017.
- 307 3. Rienties B, Luchoomun D, Tempelaar D. Academic and social integration of Master students:  
308 a cross-institutional comparison between Dutch and international students. Innovations in  
309 Education and Teaching International. 2014; 51:130-41.
- 310 4. Smith RA, Khawaja NG. A review of the acculturation experiences of international students.  
311 International Journal of Intercultural Relations. 2011; 35:699-713.
- 312 5. Yu B, Chen X, Li S, Liu Y, Jacques-Tiura AJ, Yan H. Acculturative stress and influential  
313 factors among international students in China: A structural dynamic perspective. PLoS ONE.  
314 2014; 9:e96322.
- 315 6. Yu B, Chen XG, Li SY. Globalization, acculturative stress and their impact on health. Chinese  
316 Journal of Epidemiology. 2014; 35:338-41.



- 317 7. Berry J. Acculturation: Living successfully in two cultures. *International Journal of*  
318 *Intercultural Relations*. 2005; 29:697-712.
- 319 8. LaFromboise T, Coleman HLK, Gerton J. Psychological impact of biculturalism: evidence  
320 and theory. *Psychol Bull*. 1993; 114:395-412.
- 321 9. Berry J, Sabatier C. Variations in the assessment of acculturation attitudes: Their relationships  
322 with psychological wellbeing. *International Journal of Intercultural Relations*. 2011; 35:658-  
323 69.
- 324 10. Berry J, Sabatier C. Acculturation, discrimination, and adaptation among second generation  
325 immigrant youth in Montreal and Paris. *International Journal of Intercultural Relations*. 2010;  
326 34:191-207.
- 327 11. Kim E. Multidimensional acculturation attitudes and depressive symptoms in Korean  
328 Americans. *Issues Ment Health Nurs*. 2009; 30:98-103.
- 329 12. Neto F. Acculturation strategies among adolescents from immigrant families in Portugal.  
330 *International Journal of Intercultural Relations*. 2002; 26:17-38.
- 331 13. Fosados R, McClain A, Ritt-Olson A, Sussman S, Soto D, Baezconde-Garbanati L, et al. The  
332 influence of acculturation on drug and alcohol use in a sample of adolescents. *Addict Behav*.  
333 2007; 32:2990-3004.
- 334 14. Tartakovsky E. Factors affecting immigrants' acculturation intentions: A theoretical model  
335 and its assessment among adolescent immigrants from Russia and Ukraine in Israel.  
336 *International Journal of Intercultural Relations*. 2012; 36:83-99.
- 337 15. Cao C, Zhu C, Meng Q. Predicting Chinese international students' acculturation strategies  
338 from socio-demographic variables and social ties. *Asian J Soc Psychol*. 2017; 20:85-96.
- 339 16. Ünlü Ince B, Fassaert T, de Wit MAS, Cuijpers P, Smit J, Ruwaard J, et al. The relationship

- 340 between acculturation strategies and depressive and anxiety disorders in Turkish migrants in  
341 the Netherlands. *BMC Psychiatry*. 2014; 14:252.
- 342 17. De Verthelyi RF. International students' spouses: Invisible sojourners in the culture shock  
343 literature. *International Journal of Intercultural Relations*. 1995; 19:387-411.
- 344 18. Poyrazli S, Kavanaugh PR. Marital status, ethnicity, academic achievement, and adjustment  
345 strains: The case of graduate international students. *College Student Journal*. 2006; 40:767-  
346 80.
- 347 19. Wang J. A Study on Cross Cultural Adaptation of Indonesian Students at Anhui University  
348 [THESIS.MASTER]: Anhui University; 2014.
- 349 20. Needham BL, Mukherjee B, Bagchi P, Kim C, Mukherjee A, Kandula NR, et al.  
350 Acculturation strategies and symptoms of depression: the mediators of atherosclerosis in  
351 south Asians living in America (MASALA) study. *J Immigr Minor Health*. 2017; 20:1-7.
- 352 21. Pan JY, Wong DFK. Acculturative stressors and acculturative strategies as predictors of  
353 negative affect among Chinese international students in Australia and Hong Kong: a cross-  
354 cultural comparative study. *Acad Psychiatry*. 2011; 35:376-81.
- 355 22. Yoon E, Chang C-T, Kim S, Clawson A, Cleary SE, Hansen M, et al. A meta-analysis of  
356 acculturation/enculturation and mental health. *Journal of Counseling Psychology*. 2013;  
357 60:15-30.
- 358 23. Behara J, Khan KA, Hasan B. Predicting effects of acculturation strategies on acculturative  
359 stress. *IJPP*. 2018; 9.
- 360 24. Morawa E, Erim Y. Acculturation and depressive symptoms among Turkish immigrants in  
361 Germany. *Int J Environ Res Public Health*. 2014; 11:9503-21.
- 362 25. Kaplan RC, Bangdiwala SI, Barnhart JM, Castañeda SF, Gellman MD, Lee DJ, et al. Smoking

- 363 among U.S. Hispanic/Latino adults: the Hispanic community health study/study of Latinos.  
364 American Journal of Preventive Medicine. 2014; 46:496-506.
- 365 26. Lui PP, Zamboanga BL. Acculturation and alcohol use among Asian Americans: A meta-  
366 analytic review. Psychol Addict Behav. 2018; 32:173-86.
- 367 27. Bai J. Perceived Support as a Predictor of Acculturative Stress Among International Students  
368 in the United States. . Journal of International Students. 2016; 6:93-106.
- 369 28. Qin Y. A Study On The Cross Culture Adaption of Foreign Students in China  
370 [THESIS.MASTER]: SHENYANG AEROSPACE UNIVERSITY; 2017.
- 371 29. Rice KG, Choi C-C, Zhang Y, Morero YI, Anderson D. Self-Critical Perfectionism,  
372 Acculturative Stress, and Depression Among International Students. Couns Psychol. 2012;  
373 40:575-600.
- 374 30. Yang XY, Yang F. Acculturation Versus Cultural Retention: The Interactive Impact of  
375 Acculturation and Co-ethnic Ties on Substance Use Among Chinese Students in the United  
376 States. J Immigr Minor Health. 2018; 20:546-60.
- 377 31. Lv N. The influence of enrolling overseas students on economic development in our  
378 country—from public financial impact view [THESIS.DOCTORAL]: Financial science  
379 research institute of the ministry of finance; 2015.
- 380 32. Ministry of E. The double increase in the service scale of studying abroad and returning to  
381 China. Ministry of Education of the People's Republic of China. 2018.
- 382 33. The Ministry of Education the People's Republic of C. A statistic of Chinese international  
383 students in 2016. The Ministry of Education the People's Republic of China. 2017.
- 384 34. Liu Y, Chen X, Li S, Yu B, Wang Y, Yan H. Path Analysis of Acculturative Stress  
385 Components and Their Relationship with Depression Among International Students in China.

- 386 Stress Health. 2016; 32:524-32.
- 387 35. Berry J. Immigration, acculturation, and adaptation. *Applied Psychology*. 1997; 42:5-34.
- 388 36. Johnson KL, Carroll JF, Fulda KG, Cardarelli K, Cardarelli R. Acculturation and self-  
389 reported health among Hispanics using a socio-behavioral model: the North Texas Healthy  
390 Heart Study. *BMC Public Health*. 2010; 10:53.
- 391 37. Torres L, Driscoll MW, Voell M. Discrimination, acculturation, acculturative stress, and  
392 Latino psychological distress: a moderated mediational model. *Cultur Divers Ethnic Minor*  
393 *Psychol*. 2012; 18:17-25.
- 394 38. Ward C, Kennedy A. Acculturation strategies, psychological adjustment, and sociocultural  
395 competence during cross-cultural transitions. *International Journal of Intercultural Relations*.  
396 1994; 18:329-43.
- 397 39. Sandhu DS, Asrabadi BR. Development of an Acculturative Stress Scale for International  
398 Students: preliminary findings. *Psychol Rep*. 1994; 75:435-48.
- 399 40. Radloff LS. The CES-D scale: A self-report depression scale for research in the general  
400 population. *Appl Psychol Meas*. 1977; 1:385-401.
- 401 41. Andresen EM, Malmgren JA, Carter WB, Patrick DL. Screening for depression in well older  
402 adults: evaluation of a short form of the CES-D (Center for Epidemiologic Studies Depression  
403 Scale). *Am J Prev Med*. 1994; 10:77-84.
- 404 42. Wang J. An Empirical Study on Correlation Factors and Acculturation Strategies of Asian  
405 Students in China [THESIS.MASTER]: Chongqing University; 2013.
- 406 43. Sun Y. Chinese students in Japan: the mediator and the moderator between their personality  
407 and mental health. *Int J Psychol*. 2012; 48:215-23.
- 408 44. Berry J, Kim U, Minde T, Mok D. Comparative studies of acculturative stress. *International*

- 409 Migration Review. 1987; 21:491.
- 410 45. Van Oudenhoven JP, Prins KS, Buunk BP. Attitudes of minority and majority members  
411 towards adaptation of immigrants. *Eur J Soc Psychol.* 1998; 28:995-1013.
- 412 46. Gu Q. Maturity and Interculturality: Chinese students' experiences in UK higher education.  
413 *Eur J Education.* 2009; 44:37-52.
- 414 47. Inoue T, Ito T. Acculturation attitudes and mental health of international students in their first  
415 year. *Shinrigaku Kenkyu.* 1997; 68:298-304.
- 416 48. Zhang R. Study on the Social and Cultural Adaptation of Mongolian Students in China.  
417 *Journal of Inner Mongolia Normal University (Philosophy & Social Science).* 2017; 46:151-  
418 5.
- 419 49. He S. Research on Status Quo and Countermeasures of Liberal Arts Students and Science  
420 Students' Intercultural Communicative Competence [THESIS.MASTER]: Hunan University  
421 of Science and Technology; 2013.
- 422 50. National Committee of the Chinese People's Political Consultative Conference tN, Religious  
423 C. the religious profile of Chinese. Chinese Literature and History Publishing House 2008.
- 424 51. Akhtar M, Kröner-Herwig B. Acculturative Stress Among International Students in Context  
425 of Socio-Demographic Variables and Coping Styles. *Curr Psychol.* 2015; 34:803-15.
- 426 52. Kashima ES, Loh E. International students' acculturation: Effects of international, conational,  
427 and local ties and need for closure. *International Journal of Intercultural Relations.* 2006;  
428 30:471-85.
- 429 53. Alcott YD, Watt SE. Acculturation Strategy and Racial Group in the Perception of  
430 Immigrants. *Journal of Pacific Rim Psychology.* 2017; 11:1-16.
- 431 54. Greenland K, Brown R. Acculturation and contact in Japanese students studying in the United

- 432 Kingdom. *J Soc Psychol.* 2005; 145:373-89.
- 433 55. Suanet I, Van de Vijver FJR. Perceived cultural distance and acculturation among exchange  
434 students in Russia. *J Community Appl Soc Psychol.* 2009; 19:182-97.
- 435 56. Gil AG, Vega WA. Two Different Worlds: Acculturation Stress and Adaptation among  
436 Cuban and Nicaraguan Families. *J Soc Pers Relat.* 1996; 13:435-56.
- 437 57. Cuellar I, Bastida E, Braccio SM. Residency in the United States, subjective well-being, and  
438 depression in an older Mexican-origin sample. *J Aging Health.* 2004; 16:447-66.
- 439 58. Saravanan C, Alias A, Mohamad M. The effects of brief individual cognitive behavioural  
440 therapy for depression and homesickness among international students in Malaysia. *J Affect*  
441 *Disord.* 2017; 220:108-16.
- 442 59. Sussman S, Brannon BR, Dent CW, Hansen WB, Johnson CA, Flay BR. Relations of coping  
443 effort, coping strategies, perceived stress, and cigarette smoking among adolescents. *Int J*  
444 *Addict.* 1993; 28:599-612.

445

446

447

448

449

450

## 451 **Main results**

452 **Table 1. Characteristics of the study sample**

| <b>Variables</b>                | <b>Male</b>   | <b>Female</b> | <b>Total</b>  |
|---------------------------------|---------------|---------------|---------------|
| <b>Total, n (%)</b>             | 336 (59.26)   | 231 (47.04)   | 567 (100.00)  |
| <b>Age, n (%)</b>               |               |               |               |
| 20 or less                      | 99 (29.46)    | 100 (43.29)   | 199 (35.10)   |
| 21-25                           | 160 (47.62)   | 106 (45.89)   | 266 (46.91)   |
| >25                             | 77 (22.92)    | 25 (10.82)    | 102 (17.99)   |
| Mean (SD)                       | 23.36 (4.43)  | 21.85 (3.40)  | 22.75 (4.11)  |
| <b>Place of origin, n (%)</b>   |               |               |               |
| Asia                            | 132 (40.24)   | 110 (49.11)   | 242 (43.84)   |
| Africa                          | 147 (44.82)   | 76 (33.93)    | 223 (40.40)   |
| Others                          | 49 (14.94)    | 38 (16.96)    | 87 (15.76)    |
| <b>Marital status, n (%)</b>    |               |               |               |
| Unmarried                       | 291 (87.65)   | 210 (91.70)   | 501 (89.30)   |
| Others                          | 41 (12.35)    | 19 (8.30)     | 60 (10.70)    |
| <b>Education, n (%)</b>         |               |               |               |
| Undergraduate                   | 240 (74.30)   | 179 (79.20)   | 419 (76.32)   |
| Graduate                        | 83 (25.70)    | 47 (20.80)    | 130 (23.68)   |
| <b>Religion, n (%)</b>          |               |               |               |
| Christian                       | 113 (33.73)   | 88 (38.77)    | 201 (35.77)   |
| Muslim                          | 133 (33.73)   | 52 (22.91)    | 185 (32.92)   |
| Buddhist/Hindu                  | 43 (12.84)    | 58 (25.55)    | 101 (17.97)   |
| Others                          | 4 (1.19)      | 2 (0.88)      | 6 (1.07)      |
| None                            | 42 (12.54)    | 27 (11.89)    | 69 (12.28)    |
| <b>Duration in China, n (%)</b> |               |               |               |
| One year or less                | 239 (71.13)   | 171 (74.03)   | 410 (72.31)   |
| More than one year              | 97 (28.87)    | 60 (25.97)    | 157 (27.69)   |
| Mean (SD), months               | 14.77 (12.28) | 13.98 (11.88) | 14.45 (12.11) |
| <b>Major, n (%)</b>             |               |               |               |
| Science/Engineering             | 57 (12.27)    | 21 (9.21)     | 78 (13.98)    |

|                                             |             |             |             |
|---------------------------------------------|-------------|-------------|-------------|
| Literature/Art                              | 116 (35.15) | 79 (34.64)  | 195 (34.95) |
| Medicine                                    | 101 (30.61) | 96 (42.11)  | 197 (35.30) |
| Others                                      | 56 (16.97)  | 32 (14.04)  | 88 (15.77)  |
| <b>If like major, n (%)</b>                 |             |             |             |
| Don't like                                  | 36 (11.04)  | 26 (11.45)  | 62 (11.21)  |
| Don't know                                  | 27 (8.28)   | 21 (9.25)   | 48 (8.68)   |
| Like                                        | 263 (80.67) | 180 (79.30) | 443 (80.11) |
| <b>Preparedness, n (%)</b>                  |             |             |             |
| Not well                                    | 90 (29.70)  | 52 (23.96)  | 142 (27.31) |
| Well                                        | 213 (70.30) | 165 (76.04) | 378 (72.69) |
| <b>Number of roommates, n</b>               |             |             |             |
| 0                                           | 77 (23.69)  | 53 (24.77)  | 130 (24.12) |
| 1                                           | 105 (32.31) | 63 (29.44)  | 168 (31.17) |
| 2                                           | 65 (20.00)  | 35 (16.36)  | 100 (18.55) |
| 3 or more                                   | 78 (24.00)  | 63 (29.44)  | 141 (26.16) |
| <b>Study time in weekday (hours), n (%)</b> |             |             |             |
| 0-2                                         | 67 (20.30)  | 51 (22.37)  | 118 (21.15) |
| 3-4                                         | 88 (26.67)  | 62 (27.19)  | 150 (26.88) |
| 5-6                                         | 67 (20.30)  | 49 (21.49)  | 116 (20.79) |
| >6                                          | 108 (32.73) | 66 (28.95)  | 174 (31.18) |
| <b>Study time in weekend (hours), n (%)</b> |             |             |             |
| 0-2                                         | 108 (32.53) | 80 (35.09)  | 188 (33.57) |
| 3-4                                         | 95 (28.61)  | 73 (32.02)  | 168 (30.00) |
| 5-6                                         | 58 (17.47)  | 39 (17.11)  | 97 (17.32)  |
| >6                                          | 71 (21.39)  | 36 (15.79)  | 107 (19.11) |



**Table 2. Associated factors of acculturation strategies among international students in China**

| <b>Variables</b>              | <b>Marginalization</b> | <b>Separation</b> | <b>Assimilation</b> | <b>Integration</b> | <b><math>\chi^2</math> (p value)</b> |
|-------------------------------|------------------------|-------------------|---------------------|--------------------|--------------------------------------|
| <b>Total, n (%)</b>           | 164 (28.92)            | 124 (21.87)       | 100 (17.54)         | 179 (31.57)        |                                      |
| <b>Gender, n (%)</b>          |                        |                   |                     |                    | $\chi^2=21.61$ (p<0.001)             |
| Male                          | 103 (62.80)            | 52 (41.94)        | 70 (70.00)          | 111 (62.01)        |                                      |
| Female                        | 61 (37.20)             | 72 (58.06)        | 30 (30.00)          | 68 (37.99)         |                                      |
| <b>Age, n (%)</b>             |                        |                   |                     |                    | $\chi^2=10.83$ (p=0.09)              |
| 20 or less                    | 59 (35.98)             | 54 (43.55)        | 28 (28.00)          | 58 (32.40)         |                                      |
| 21-25                         | 75 (45.73)             | 54 (43.55)        | 46 (46.00)          | 91 (50.84)         |                                      |
| >25                           | 30 (18.29)             | 16 (12.90)        | 26 (26.00)          | 30 (16.76)         |                                      |
| <b>Place of origin, n (%)</b> |                        |                   |                     |                    | $\chi^2=8.14$ (p=0.23)               |
| Asia                          | 61 (38.85)             | 63 (52.50)        | 42 (42.42)          | 76 (43.18)         |                                      |
| Africa                        | 67 (42.68)             | 43 (35.83)        | 37 (37.37)          | 76 (43.18)         |                                      |
| Others                        | 29 (18.47)             | 14 (11.67)        | 20 (20.20)          | 24 (13.64)         |                                      |
| <b>Marital status, n (%)</b>  |                        |                   |                     |                    | $\chi^2=1.77$ (p=0.62)               |
| Unmarried                     | 149 (91.98)            | 108 (87.80)       | 88 (88.89)          | 156 (88.14)        |                                      |
| Others                        | 13 (8.02)              | 15 (12.20)        | 11 (11.11)          | 21 (11.86)         |                                      |
| <b>Education, n (%)</b>       |                        |                   |                     |                    | $\chi^2=3.08$ (p=0.38)               |
| Undergraduate                 | 119 (74.38)            | 95 (78.51)        | 69 (71.13)          | 136 (79.53)        |                                      |
| Graduate                      | 41 (25.63)             | 26 (21.49)        | 28 (28.87)          | 35 (20.47)         |                                      |

|                                 |             |            |            |             |                          |
|---------------------------------|-------------|------------|------------|-------------|--------------------------|
| <b>Religion, n (%)</b>          |             |            |            |             | P<0.001*                 |
| Christian                       | 55 (33.95)  | 46 (37.10) | 35 (35.35) | 65 (36.72)  |                          |
| Muslim                          | 51 (31.48)  | 39 (31.45) | 24 (24.24) | 71 (40.11)  |                          |
| Buddhist/Hindu                  | 25 (15.43)  | 25 (20.16) | 21 (21.21) | 30 (16.95)  |                          |
| Others                          | 1 (0.62)    | 1 (0.81)   | 3 (3.03)   | 1 (0.56)    |                          |
| None                            | 30 (18.52)  | 13 (10.48) | 16 (16.16) | 10 (5.65)   |                          |
| <b>Duration in China, n (%)</b> |             |            |            |             | $\chi^2=3.65$ (p=0.30)   |
| 1 year or less                  | 121 (73.78) | 82 (66.13) | 77 (77.00) | 130 (72.63) |                          |
| More than 1 year                | 43 (26.22)  | 42 (33.87) | 23 (23.00) | 49 (27.37)  |                          |
| <b>Major, n (%)</b>             |             |            |            |             | $\chi^2=38.94$ (p<0.001) |
| Science/Engineering             | 25 (15.63)  | 14 (11.48) | 12 (12.24) | 27 (15.17)  |                          |
| Literature/Art                  | 65 (40.63)  | 25 (20.49) | 47 (47.96) | 58 (32.58)  |                          |
| Medicine                        | 49 (30.63)  | 68 (55.74) | 22 (22.45) | 58 (32.58)  |                          |
| Others                          | 21 (13.13)  | 15 (12.30) | 17 (17.35) | 35 (19.66)  |                          |
| <b>If like major, n (%)</b>     |             |            |            |             | $\chi^2=13.23$ (p=0.04)  |
| Don't like                      | 24 (15.29)  | 14 (11.38) | 6 (6.06)   | 18 (10.34)  |                          |
| Don't know                      | 21 (13.38)  | 10 (8.13)  | 7 (7.07)   | 10 (5.75)   |                          |
| Like                            | 112 (71.34) | 99 (80.49) | 86 (86.87) | 146 (83.91) |                          |
| <b>Preparedness, n (%)</b>      |             |            |            |             | $\chi^2=8.21$ (p=0.04)   |
| Not well                        | 52 (35.86)  | 31 (26.96) | 22 (23.66) | 37 (22.16)  |                          |
| Well                            | 93 (64.14)  | 84 (73.04) | 71 (76.34) | 130 (77.84) |                          |

|                                             |            |            |            |            |                          |
|---------------------------------------------|------------|------------|------------|------------|--------------------------|
| <b>Number of roommate, n (%)</b>            |            |            |            |            | $\chi^2=18.78$ (p=0.03)  |
| 0                                           | 38 (24.68) | 21 (17.36) | 29 (30.53) | 42 (24.85) |                          |
| 1                                           | 48 (31.17) | 31 (25.62) | 26 (27.37) | 63 (37.28) |                          |
| 2                                           | 28 (18.18) | 22 (18.18) | 20 (21.05) | 30 (17.75) |                          |
| 3 or more                                   | 40 (25.97) | 47 (38.84) | 20 (21.05) | 34 (20.12) |                          |
| <b>Study time in weekday (hours), n (%)</b> |            |            |            |            | $\chi^2=25.74$ (p=0.002) |
| 0-2                                         | 48 (30.19) | 24 (19.51) | 25 (25.00) | 21 (11.93) |                          |
| 3-4                                         | 39 (24.53) | 39 (31.71) | 20 (20.00) | 52 (29.55) |                          |
| 5-6                                         | 30 (18.87) | 19 (15.45) | 28 (28.00) | 39 (22.16) |                          |
| >6                                          | 42 (26.42) | 41 (33.33) | 27 (27.00) | 64 (36.36) |                          |
| <b>Study time in weekend (hours), n (%)</b> |            |            |            |            | $\chi^2=15.30$ (p=0.08)  |
| 0-2                                         | 67 (41.88) | 36 (29.27) | 37 (37.00) | 48 (27.12) |                          |
| 3-4                                         | 38 (23.75) | 34 (27.64) | 32 (32.00) | 64 (36.16) |                          |
| 5-6                                         | 23 (14.38) | 28 (22.76) | 16 (16.00) | 30 (16.95) |                          |
| >6                                          | 32 (20.00) | 25 (20.33) | 15 (15.00) | 35 (19.77) |                          |

Note: \* fisher test;

**Table 3. Multinomial logistic regression of acculturation strategies and associated factors, Odds Ratio [95% CI].**

| Variables                  | Separation               | Assimilation              | Integration               |
|----------------------------|--------------------------|---------------------------|---------------------------|
| <b>Gender</b>              |                          |                           |                           |
| Male (ref)                 |                          |                           |                           |
| Female                     | <b>1.86 [1.03, 3.35]</b> | 0.54 [0.28, 1.03]         | 0.91 [0.53, 1.60]         |
| <b>Age</b>                 |                          |                           |                           |
| 20 or less (ref)           |                          |                           |                           |
| 21-25                      | 0.87 [0.46, 1.64]        | 1.39 [0.69, 2.82]         | 1.08 [0.60, 1.96]         |
| >25                        | 0.93 [0.35, 2.42]        | 1.63 [0.66, 4.01]         | 0.75 [0.32, 1.75]         |
| <b>Religion, n (%)</b>     |                          |                           |                           |
| Christian                  | 1.43 [0.58, 3.51]        | 1.03 [0.43, 2.44]         | <b>2.61 [1.01, 6.79]</b>  |
| Muslim                     | 1.12 [0.41, 3.05]        | 1.01 [0.38, 2.69]         | <b>4.55 [1.65, 12.53]</b> |
| Buddhist/Hindu             | 0.96 [0.33, 2.80]        | 1.72 [0.61, 4.87]         | <b>3.57 [1.20, 10.65]</b> |
| Others                     | 1.33 [0.06, 28.51]       | 3.88 [0.28, 52.92]        | 2.69 [0.14, 51.59]        |
| None (ref)                 |                          |                           |                           |
| <b>Major</b>               |                          |                           |                           |
| Science/Engineering (ref)  |                          |                           |                           |
| Literature/Art             | 0.49 [0.20, 1.22]        | <b>3.00 [1.05, 8.59]</b>  | 0.86 [0.38, 1.91]         |
| Medicine                   | 1.78 [0.69, 4.59]        | 1.74 [0.53, 5.75]         | 0.82 [0.34, 2.00]         |
| Others                     | 1.29 [0.43, 3.87]        | <b>3.75 [1.10, 12.79]</b> | 1.74 [0.65, 4.68]         |
| <b>If like major</b>       |                          |                           |                           |
| Don't like (ref)           |                          |                           |                           |
| Don't know                 | 0.76 [0.24, 2.43]        | 1.23 [0.29, 5.20]         | 0.81 [0.25, 2.61]         |
| Like                       | 1.18 [0.50, 2.78]        | <b>3.05 [1.01, 9.18]</b>  | 1.58 [0.70, 3.56]         |
| <b>Preparedness</b>        |                          |                           |                           |
| Not well (ref)             |                          |                           |                           |
| Well                       | 1.27 [0.68, 2.36]        | 1.79 [0.91, 3.51]         | 1.68 [0.93, 3.01]         |
| <b>Number of roommates</b> | 1.27 [0.99, 1.64]        | 1.10 [0.83, 1.44]         | 0.99 [0.78, 1.26]         |

---

**Study time in weekday**

|           |                   |                   |                          |
|-----------|-------------------|-------------------|--------------------------|
| 0-2 (Ref) |                   |                   |                          |
| 3-4       | 1.17 [0.53, 2.58] | 0.84 [0.35, 2.00] | <b>2.83 [1.28, 6.30]</b> |
| 5-6       | 1.15 [0.45, 2.96] | 2.46 [0.99, 6.14] | <b>3.65 [1.47, 9.08]</b> |
| >6        | 1.46 [0.62, 3.44] | 1.33 [0.53, 3.31] | <b>3.99 [1.70, 9.39]</b> |

**Study time in weekend**

|           |                   |                   |                          |
|-----------|-------------------|-------------------|--------------------------|
| 0-2 (Ref) |                   |                   |                          |
| 3-4       | 1.49 [0.72, 3.09] | 1.67 [0.79, 3.53] | <b>1.94 [1.00, 3.79]</b> |
| 5-6       | 2.27 [0.95, 5.44] | 1.10 [0.42, 2.87] | 1.18 [0.51, 2.76]        |
| >6        | 1.03 [0.41, 2.59] | 0.71 [0.26, 1.96] | 0.93 [0.40, 2.16]        |

---

Note: Marginalization was used as reference group.

**Table 4. Associations between acculturation strategies with mental health status among international students in China, regression coefficients ( $\beta$ )**

| Variables                   | Marginalization | Separation | Assimilation | Integration |
|-----------------------------|-----------------|------------|--------------|-------------|
| <i>Mental health status</i> |                 |            |              |             |
| <b>Acculturative stress</b> |                 |            |              |             |
| Total                       | Ref             | 11.08**    | 3.30         | 6.66*       |
| HS                          | Ref             | 3.14**     | 0.61         | 1.69**      |
| VC                          | Ref             | 1.77**     | 1.08*        | 1.40**      |
| IT                          | Ref             | 0.88       | 0.15         | 0.27        |
| OD                          | Ref             | 0.16       | 0.20         | 0.31        |
| MT                          | Ref             | 1.18*      | 0.41         | 0.80        |
| CC                          | Ref             | 1.75**     | -0.29        | 1.04*       |
| SC                          | Ref             | 1.34*      | 0.91         | 0.71        |
| <b>Depression</b>           | Ref             | 0.09       | -0.08        | -0.07       |

Note: <sup>1</sup>Age, gender, religion, major and study time were controlled. <sup>2</sup>HS = Homesickness, VC= Value conflict, IT= Identity threat, OD = Opportunity deprivation, MT = Mistreated, CC = Lack of cultural competence, SC = Lack of self-confidence. <sup>3</sup>\* p<0.05, \*\*p<0.001

| Acculturation <sup>o</sup>       |                          | Host Culture <sup>o</sup> |                              |
|----------------------------------|--------------------------|---------------------------|------------------------------|
|                                  |                          | Adoption <sup>o</sup>     | Rejection <sup>o</sup>       |
| Heritage<br>culture <sup>o</sup> | Maintenance <sup>o</sup> | Integration <sup>o</sup>  | Separation <sup>o</sup>      |
|                                  | Rejection <sup>o</sup>   | Assimilation <sup>o</sup> | Marginalization <sup>o</sup> |

**Fig 1. Acculturation strategies based on the attitudes towards the host culture and heritage culture**





|                       |               |                |                   |
|-----------------------|---------------|----------------|-------------------|
| Acculturation ↻       |               | Host Culture ↻ |                   |
|                       |               | Adoption ↻     | Rejection ↻       |
| Heritage<br>culture ↻ | Maintenance ↻ | Integration ↻  | Separation ↻      |
|                       | Rejection ↻   | Assimilation ↻ | Marginalization ↻ |

Figure
